# Supplementary material for: The Catalase Gene Family in Cotton: Genome-Wide Characterization and Bioinformatics Analysis
Source: MDPI journal article supplement (doi:10.3390/cells8020086), 2019-01-24
Supplement: s1 [file s1]

## Supplementary Files

### The Catalase Gene Family in Cotton: Genome-Wide Characterization and Bioinformatics Analysis

Wei Wang, Yingying Cheng, Dongdong Chen, Dan Liu, Mengjiao Hu, Jie Dong, Xiaopei Zhang, Lirong Song and Fafu Shen \*

### Contents

**Supplementary file 1: Table S1.** Summary of some plant *CAT* genes in relation to the biotic and abiotic stress resistance.

**Supplementary file 2: Table S2.** Primers used in this study.

**Supplementary file 3: Table S3.** Gene numbers of *CAT* gene family in four other genomes descended from common eudicot genome ancestor with *Gossypium* in Rosids.

**Supplementary file 4: Table S4.** Orthologous *CAT* gene pairs among *G. arboreum* L., *G. raimondii* Ulbr., *G. hirsutum* L. and *G. barbadense* L..

**Supplementary file 5: Table S5.** The details of *GhCAT* and *GbCAT* gene family expression difference in different tissues and/or organs, at developmental processes of ovules and fibers, and under different stress treatments.

**Supplementary file 6: Table S6.** List of identified TFBSs in the putative promoter regions of *GhCAT* and *GbCAT* gene family using PlantTFDB 4.0 (<http://planttfdb.cbi.pku.edu.cn/>).

**Supplementary file 7: Table S7.** The predicted details of miRNA-mediated targeting regulatory relations with the principle transcripts of *CAT* gene family in upland cotton and sea-island cotton using the psRNATarget web server (<http://plantgrn.noble.org/psRNATarget/home>).

**Supplementary file 8: Table S8.** The predicted details of miRNA-mediated targeting regulatory relations with all full-length isoforms of *CAT* gene family in upland cotton and sea-island cotton using the psRNATarget web server (<http://plantgrn.noble.org/psRNATarget/home>).

**(All the tables in additional file see a separate excel file.)**

**Supplementary file 9: Figure S1.** (A) Blast hits of *GbCAT7* (GOBAR\_AA20422) in the upland cotton genome database [cDNA, *G. hirsutum* (AD1), NAU] and the location of the designed primer pairs for cloning the actual ORF of *GbCAT7*. (B) PCR result shows that the actual TSS of *GbCAT7* is the ATG contained by the F3 forward primer (green dotted underline in A). (C) Verification of the amplified line in Figure S1 (B) by PCR-based sequencing.

**Supplementary file 10: Figure S2.** The supporting alignment result of the coding sequence of *GbCAT7*

(GOBAR\_AA20422) and Gh\_A07G1555. Query, the coding sequence of *GbCAT7*; Subject, the coding sequence of Gh\_A07G1555.

**Supplementary file 11: Figure S3.** Phylogenetic tree of *Gossypium* and four other genomes descended from common eudicot genome ancestor in Rosids and the number of *CAT* genes identified from the genomes of these plants.

**Supplementary file 12: Figure S4.** Transcriptional profiling of *GhCATs* under different abiotic stress treatments.

**Supplementary file 13: Figure S5.** Gene Ontology (GO) annotation of the TFs binding to the upland cotton and sea-island cotton *CAT* genes' putative promoter regions based on their cellular component, molecular function, and biological process.

**Supplementary file 14: Figure S6.** All potentially alternative spliced isoform structure of *GhCATs* and *GbCATs* full-length transcripts and identification of full-length isoforms targeted by cotton miRNAs.

**Supplementary file 15: Figure S7.** The relative expression levels of miRNAs and their putative targeting *CAT* genes under *V. dahliae* infection treatment.

**Supplementary file 16: Figure S8. (A, B)** Amplification of *GhCAT3* (Gh\_A05G1539) and *GhCAT7* (Gh\_A07G1556) by PCR with the designed primer pairs for cloning their transcripts. PCR results were aligned with gene structure annotation and were verified by Sanger sequencing.



▼ Gh\_A07G1555.1 LOC:A07|57085879..57086511|+;

| 1. Score     | E value                                                      | Identities       | Gaps         | Strand |
|--------------|--------------------------------------------------------------|------------------|--------------|--------|
| 742.47 (822) | $0.00 \times 10^{+00}$                                       | 411/411 (100.00) | 0/411 (0.00) | +/+    |
| Query 139    | ATGAGCATTGATGACGCTAATGAGACCGGGATAGATGATCCGAAGGGCCAGGGTTCTTCC | 198              |              |        |
| Subject 1    | ATGAGCATTGATGACGCTAATGAGACCGGGATAGATGATCCGAAGGGCCAGGGTTCTTCC | 60               |              |        |
| Query 199    | TCTAGAAAAAGAGGGAGCACTATTGATGTTGCTATTGAGATTGGGTCTGGCAGTGGCAGT | 258              |              |        |
| Subject 61   | TCTAGAAAAAGAGGGAGCACTATTGATGTTGCTATTGAGATTGGGTCTGGCAGTGGCAGT | 120              |              |        |
| Query 259    | GGATCAAATGCAAGGAAGAAAAGGGAAATGGAAATTCAGAGGTGAACCTACATGTTAC   | 318              |              |        |
| Subject 121  | GGATCAAATGCAAGGAAGAAAAGGGAAATGGAAATTCAGAGGTGAACCTACATGTTAC   | 180              |              |        |
| Query 319    | GTATGTAGTAAAAATTTACGTCCTGGAAGGCGGTGTTTCGGGCATCTGAAATCCCATCAA | 378              |              |        |
| Subject 181  | GTATGTAGTAAAAATTTACGTCCTGGAAGGCGGTGTTTCGGGCATCTGAAATCCCATCAA | 240              |              |        |
| Query 379    | AGGGAAACCCAGGGGCATTGCCTCCGCCAACATTTACGCCAACTGAGGGCTCTCCTGAA  | 438              |              |        |
| Subject 241  | AGGGAAACCCAGGGGCATTGCCTCCGCCAACATTTACGCCAACTGAGGGCTCTCCTGAA  | 300              |              |        |
| Query 439    | AATAATAATGATGATGAAACTAACCCGAGGGAGCAACTAGCTCCCACTCTGTTGAACTTG | 498              |              |        |
| Subject 301  | AATAATAATGATGATGAAACTAACCCGAGGGAGCAACTAGCTCCCACTCTGTTGAACTTG | 360              |              |        |
| Query 499    | GCTCTTGAAACCATGCAAAAGATGAGTGAAGACTCGAACATGAGTGTTGTT          | 549              |              |        |
| Subject 361  | GCTCTTGAAACCATGCAAAAGATGAGTGAAGACTCGAACATGAGTGTTGTT          | 411              |              |        |

**Supplementary file 10: Figure S2.** The supporting alignment result of the coding sequence of *GbCAT7* (GOBAR\_AA20422) and Gh\_A07G1555. Query, the coding sequence of *GbCAT7*; Subject, the coding sequence of Gh\_A07G1555.

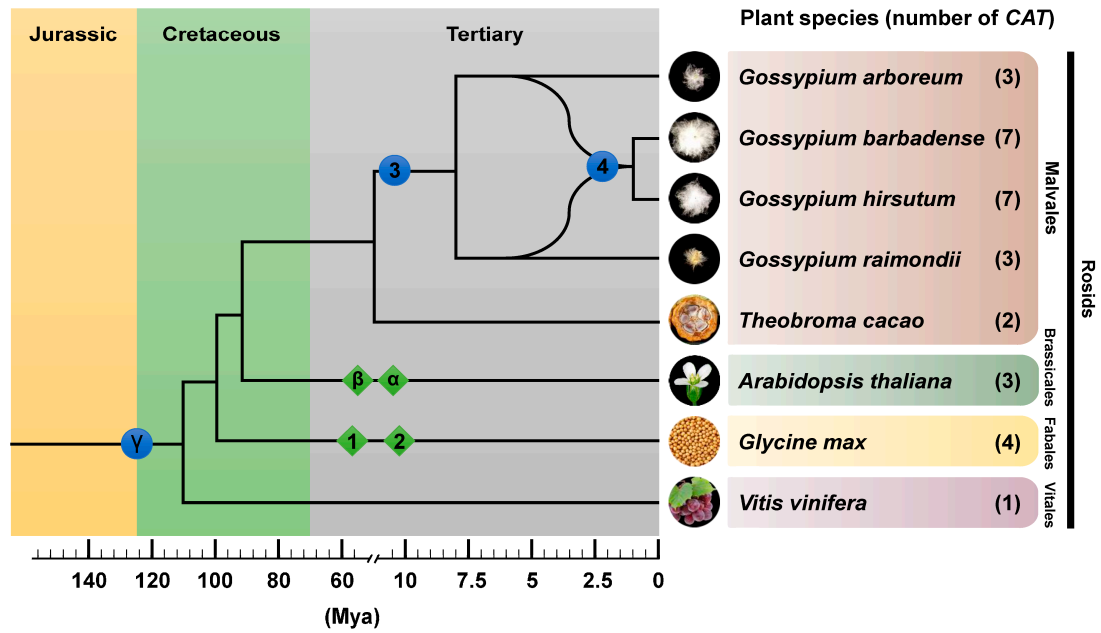

**Supplementary file 11: Figure S3.** Phylogenetic tree of *Gossypium* and four other genomes descended from common eudicot genome ancestor in Rosids and the number of *CAT* genes identified from the genomes of these plants. The phylogenetic tree of the 8 plants used in the study was gathered from the PLAZA database (version 4.0). **WGD**, whole-genome duplication; **Mya**, million years ago; **γ**, one whole genome triplication (WGT) event probably shared by all core eudicots ~130.8 Mya; **α** and **β**, two recent WGDs within the crucifer lineage; **1** and **2**, two *Glycine* WGD events; **3**, one penta- or hexaploid duplication event in the *Gossypium* lineage after splitting from cacao lineage ~16.6 Mya; **4**, neoallopolyploids reuniting divergent *Gossypium* genomes 1-2 Mya.

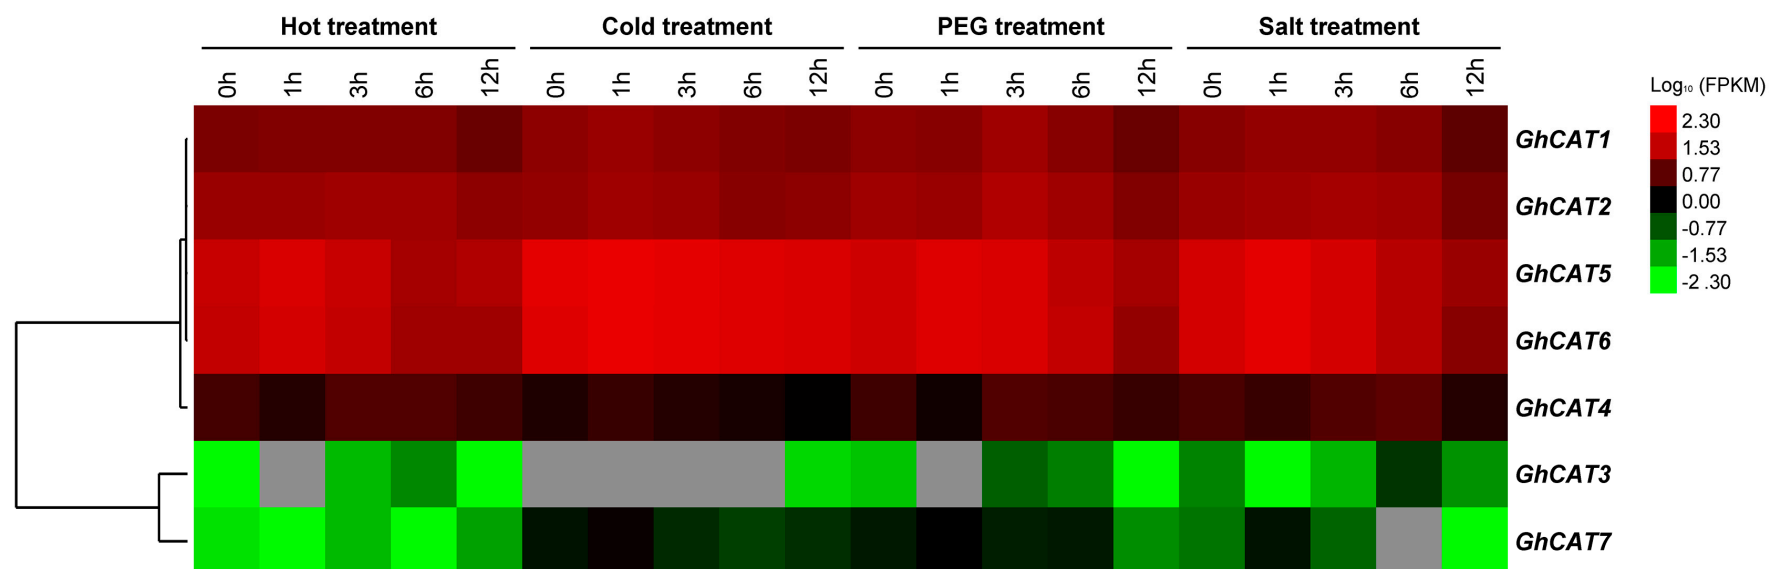

**Supplementary file 12: Figure S4.** Transcriptional profiling of *GhCATs* under different abiotic stress treatments. The  $\log_{10}$  of FPKMs values calculated by RNA-seq data were shown as a heat map. The heat-map showed the hierarchical clustering of the relative expression of 7 *GhCATs* under hot, cold, PEG and salt treatments. The colors of the bar shown to the right of the heat-map varied from red to green representing the relative expression levels from high to low. FPKMs data was obtained from ccNET (<http://structuralbiology.cau.edu.cn/gossypium/>) and CottonFGD (<https://cottonfgd.org/>).

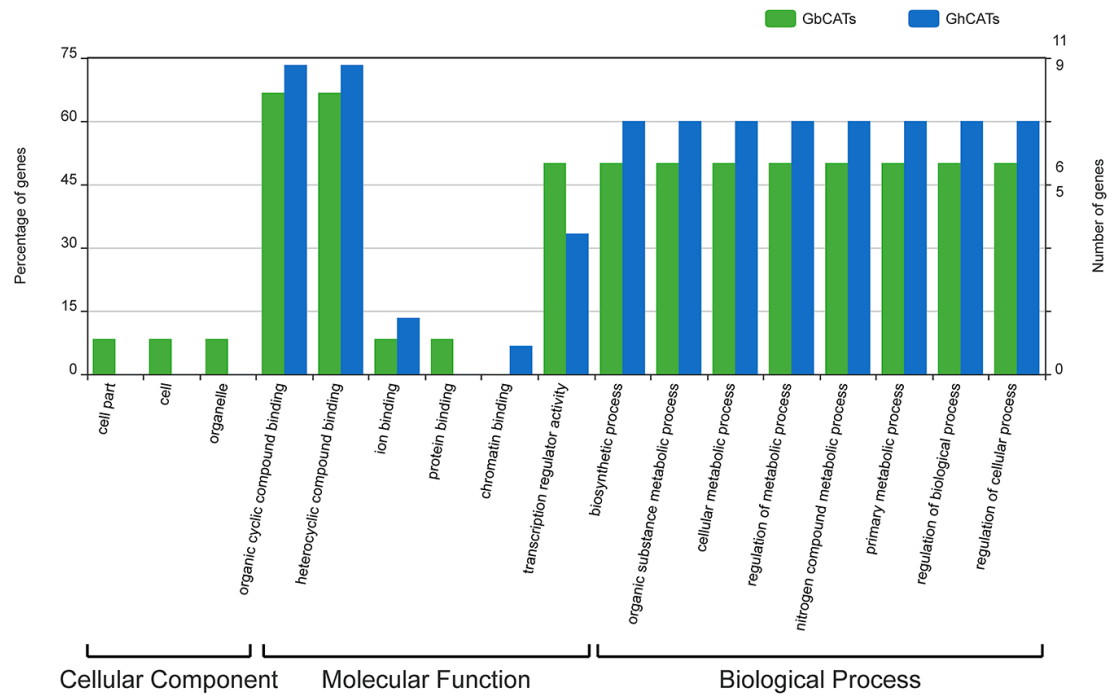

**Supplementary file 13: Figure S5.** Gene Ontology (GO) annotation of the TFs binding to the upland cotton and sea-island cotton *CAT* genes' putative promoter regions based on their cellular component, molecular function, and biological process. The functional enrichment analysis was carried out by the Gene Ontology Consortium (<http://geneontology.org/>) and were visualized and plotted by WEGO (version 2.0) (<http://wego.genomics.org.cn/>).

### *GhCAT1\_Gh\_A01G0845*

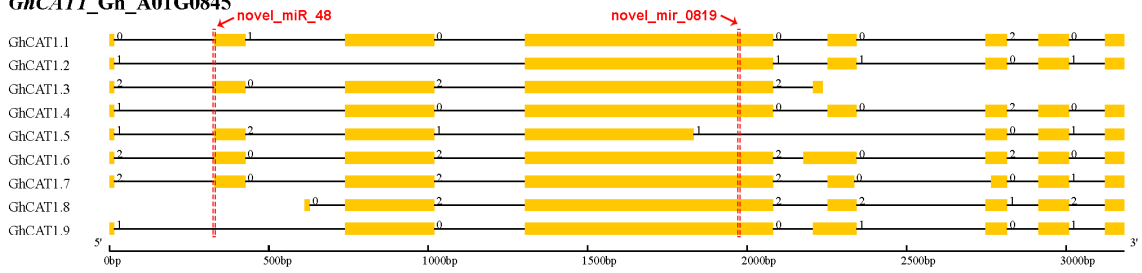

### *GhCAT2\_Gh\_D01G0873*

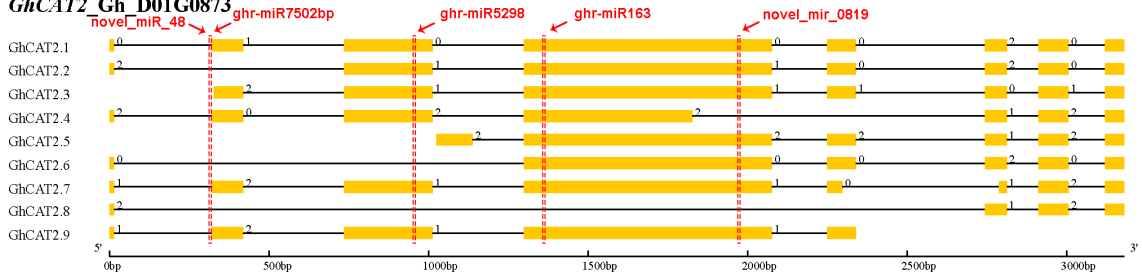

### *GhCAT3\_Gh\_A05G1539*

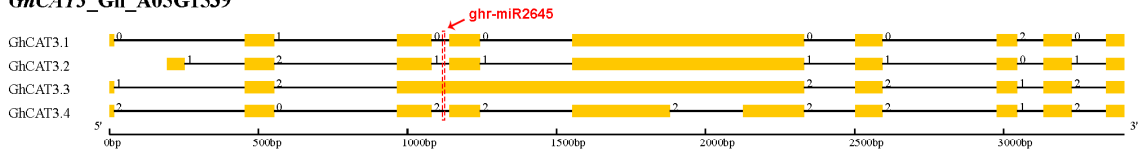

### *GhCAT4\_Gh\_D05G1710*

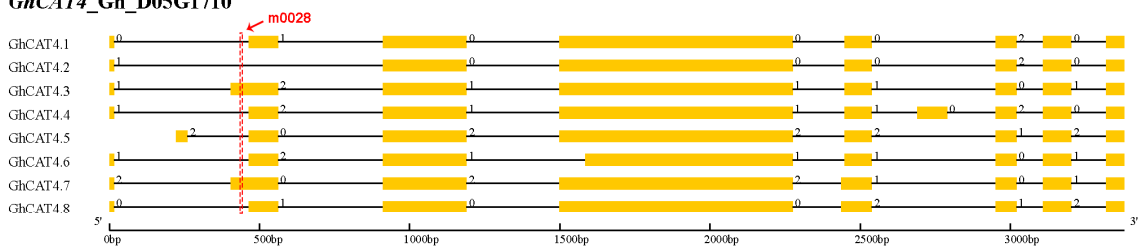

### *GhCAT5\_Gh\_A02G1698*

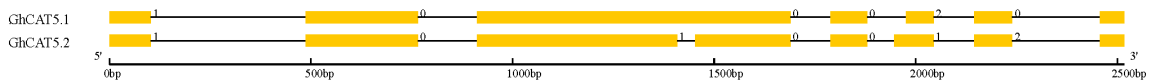

### *GhCAT6\_Gh\_D03G0021*

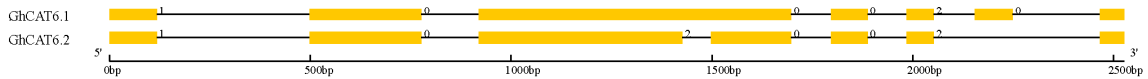

### *GhCAT7\_Gh\_A07G1556*

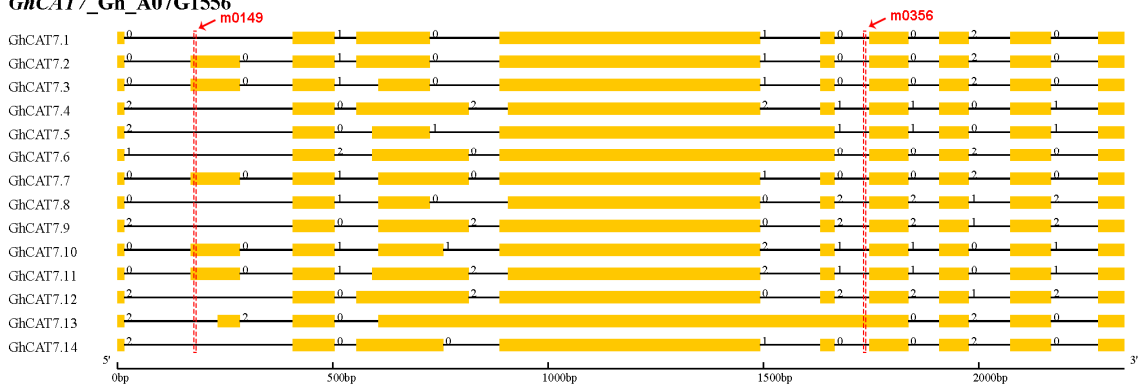



#### *GbCAT1*\_GOBAR\_AA22711

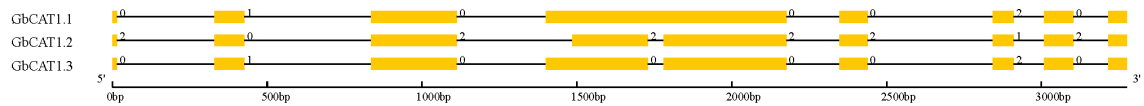

#### *GbCAT2*\_GOBAR\_DD08701

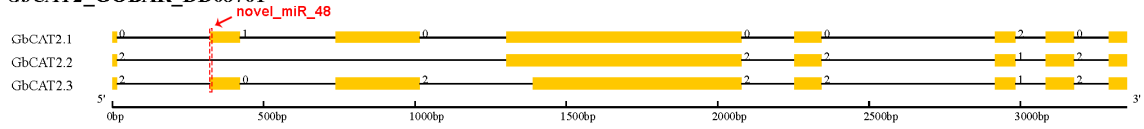

#### *GbCAT3*\_GOBAR\_AA35088

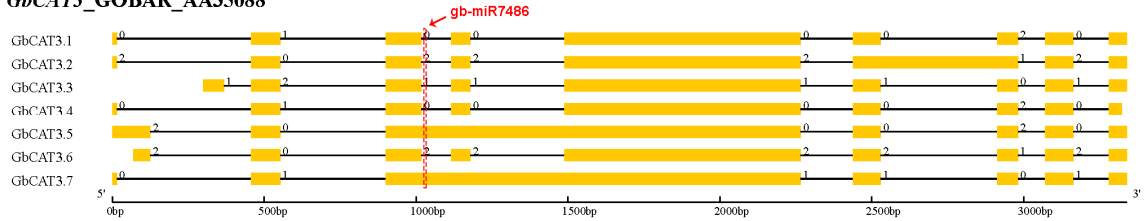

#### *GbCAT4*\_GOBAR\_DD30012

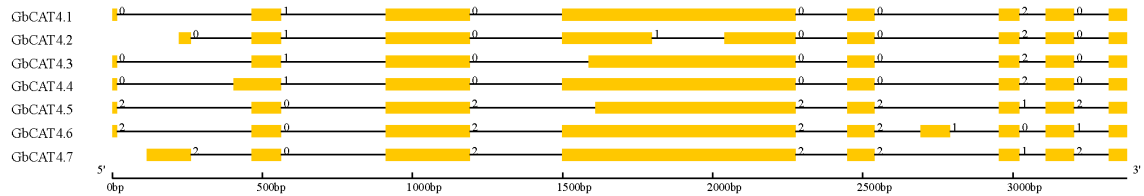

#### *GbCAT5*\_GOBAR\_AA31934

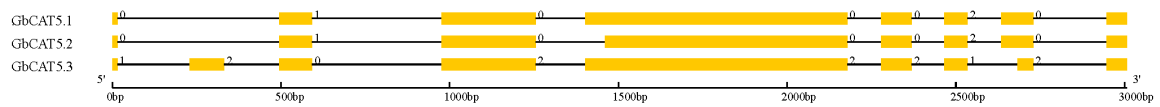

#### *GbCAT6*\_GOBAR\_AA38517

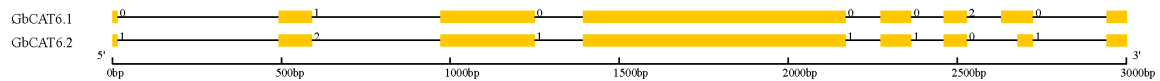

#### *GbCAT7*\_GOBAR\_AA20422

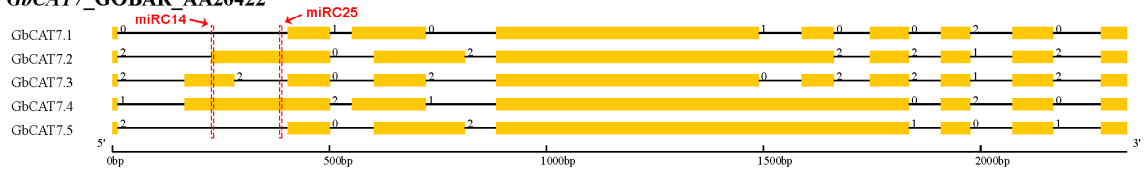

Legend:  
 Exon    — Intron    0 1 2: intron phase

**Supplementary file 14: Figure S6.** All potentially alternative spliced isoform structure of *GhCATs* and *GbCATs* full-length transcripts and identification of full-length isoforms targeted by cotton miRNAs. The first gene model of each *CAT* gene was the principle transcript, followed these were potential alternative spliced isoforms predicted with mRNA-seq data. The red dotted rectangles were the predicted miRNA targeting sites.

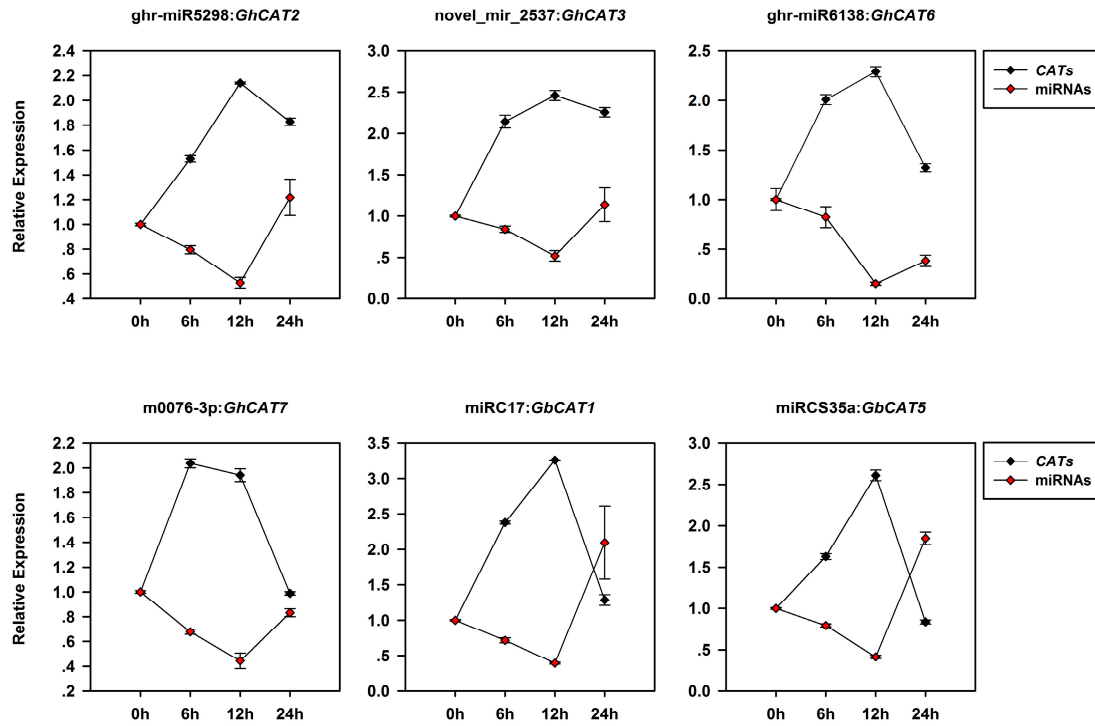

**Supplementary file 15: Figure S7.** The relative expression levels of miRNAs and their putative targeting *CAT* genes under *V. dahliae* infection treatment. qPCR quantifications were normalized to the expression of *UBQ7* of cotton. Error bars represent standard deviations of mean value from three biological replicates. ANOVA (analysis of variance) was calculated using DPS and  $p < 0.05$  was considered statistically significant.

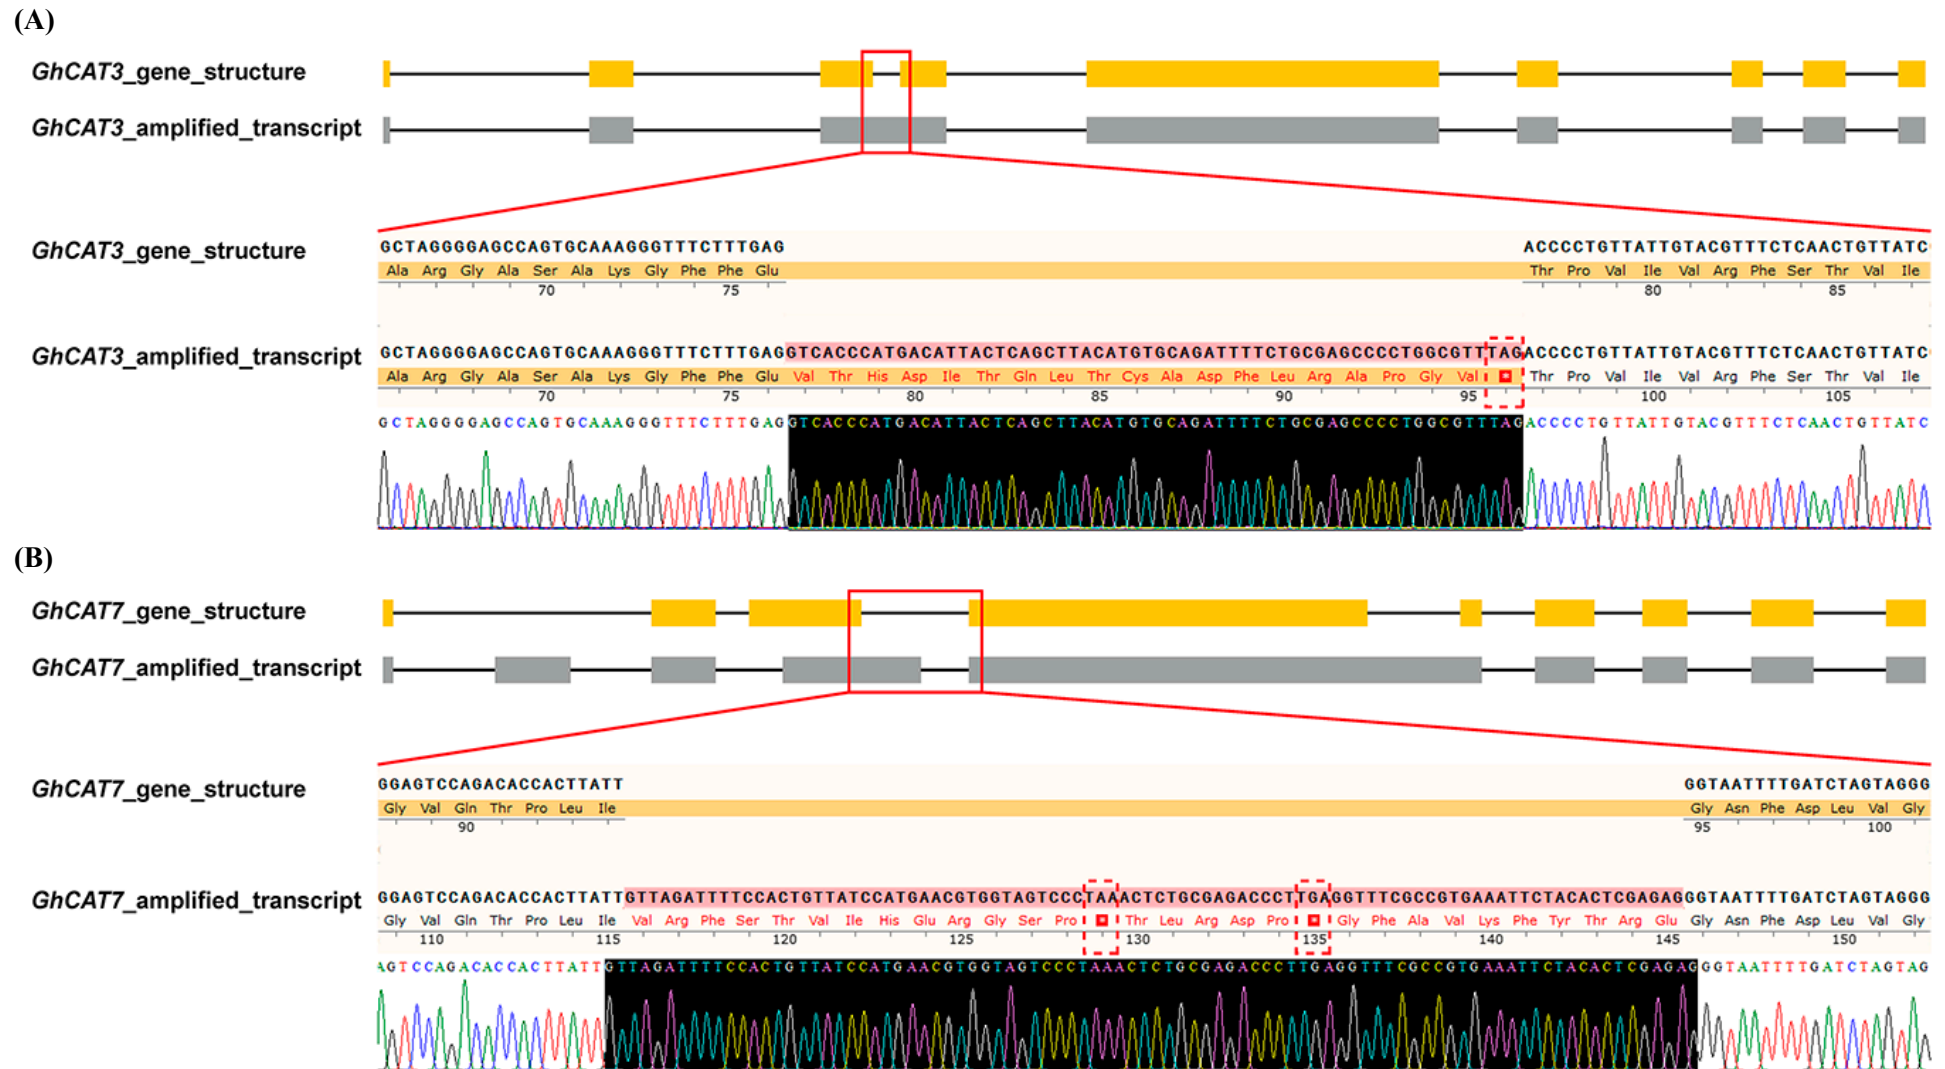

**Supplementary file 16: Figure S8. (A, B)** Amplification of *GhCAT3* (Gh\_A05G1539) and *GhCAT7* (Gh\_A07G1556) by PCR with the designed primer pairs for cloning their transcripts. The largest-rate transcripts of *GhCAT3* and *GhCAT7* were shown (21/24 and 22/48 respectively in *GhCAT3* and *GhCAT7*). PCR results were aligned with gene structure annotation and were verified by Sanger sequencing. Red dotted rectangle represented the premature termination codons (PTC).
